# Supplementary material
Source: PubMed Central journal article supplement (PMC3947323)

## Supporting Information

**Manuscript Title:** Soy Biodiesel and Petrodiesel Emissions Differ in Size, Chemical Composition and Stimulation of Inflammatory Responses in Cells and Animals

**Authors:** Naomi K. Fukagawa<sup>1\*</sup>, Muyao Li<sup>1</sup>, Matthew E. Poynter<sup>1</sup>, Brian C. Palmer<sup>1</sup>, Erin Parker<sup>1</sup>, John Kasumba<sup>2</sup>, and Britt A. Holmén<sup>2</sup>

<sup>1</sup>Department of Medicine and <sup>2</sup>School of Engineering, University of Vermont, Burlington, VT.

**Summary:** Supplementary text (pages S2 to S5)  
Supplementary tables (6; pages S5 to S8)  
Supplementary figures (7; pages S9 to S13)

## Table of Contents

|                                                                                                        |           |
|--------------------------------------------------------------------------------------------------------|-----------|
| <b>Thermal Desorption Gas Chromatography Mass Spectrometry (TD-GCMS).....</b>                          | <b>2</b>  |
| <b>Dithiothreitol (DTT) Assay .....</b>                                                                | <b>3</b>  |
| <b>Cell Culture and Biological Assays .....</b>                                                        | <b>3</b>  |
| <b>Armfield CM-12 Light-duty Diesel Engine Specifications, Test Cycle and PAH Concentrations .....</b> | <b>5</b>  |
| <b>Other Cytokine Concentrations in Cells and BALF.....</b>                                            | <b>7</b>  |
| <b>SMPS Particle Distributions – Number, Surface Area and By Engine Mode .....</b>                     | <b>9</b>  |
| <b>Relative Particle Composition by Functional Groups (Figures S3 and S4) .....</b>                    | <b>11</b> |
| <b>Cytotoxicity Results (Figure S5).....</b>                                                           | <b>12</b> |
| <b>Cytokine Adsorption in Cell-free Medium (Figure S6).....</b>                                        | <b>12</b> |
| <b>PAI-1 Concentrations in BALF and Lung (Figure S7) .....</b>                                         | <b>13</b> |

## SUPPORTING INFORMATION

### Thermal Desorption Gas Chromatography Mass Spectrometry (TD-GCMS)

Nonpolar compounds in the particulate matter were extracted using a solvent mixture of dichloromethane (DCM)/Hexanes (1:1, v/v), while the polar compounds were extracted using methanol. All extractions were performed three times in series and replicate extracts were combined for subsequent processing and analysis by TD-GCMS.

A ¼" diameter punch was removed from each filter and inserted into a 180 µL TD-vial. For nonpolar compound extraction, 70 µL of DCM/Hexanes solvent was added to the vial, followed by 5 min sonication. This was done three times, and the extracts were combined in another glass TD-vial. The nonpolar fraction was concentrated using a gentle stream of N<sub>2</sub> gas to 10 µL final volume, then covered with a 30 mL glass vial in the fume hood until all the solvent evaporated. The TD-vial was then inserted into the TD-GCMS for analysis after adding 1 µL of a 2 ppm solution of phenanthrene-d10 and perylene-d12 as internal standards.

The polar fraction was also extracted three times, but with 70 µL of methanol and sonicating for 5 min each time. The three methanol extracts were also combined in another glass TD-vial, blown down to 7 µL, and 1 µL of a 2.4 ppm solution of 6-fluoro-4-chromanone quantitation standard was added to the extract, followed by 1.5 µL of a 25 mg/mL O-(2,3,4,5,6-pentafluorobenzyl)hydroxylamine (PFBHA; Sigma-Aldrich) solution. Acetonitrile/DCM (9:1, v/v) was then added to the vial to achieve a final volume of 30 µL and a PFBHA concentration of 5 mM. The sample derivatization reaction proceeded at room temperature for 24 hours, then excess PFBHA was quenched by adding 11 µL of acetone, waiting for at least 1 hour at room temperature for the oxime to form. The sample was then blown down to near dryness before sitting for 2 hours covered by a 30 vial to evaporate remaining PFBHA-acetone oxime. The sample was then analyzed on the TD-GCMS using 1 µL of a 2 ppm solution of phenanthrene-d10 and perylene-d12 internal standards.

Chemical analysis of the filter extracts was carried out using a Hewlett Packard Gas Chromatograph(GC)/Mass Spectrometer (5890GC/5972MSD) equipped with a thermal desorption (TD) injector (Lavigne Laboratories, Storrs, CT). The GC conditions were: Restek (Rxi-XLB) capillary GC column (30 m long, 0.25 mm i.d, and 0.25 µm film thickness), 99.999% helium carrier gas at 1 mL/min, and 295° C injector operated in splitless mode, 290° C detector. The oven temperature was held at 65° C for 12 min to allow thermal desorption (10 min at 295° C) of the sample, then ramped to 186° C at a 10° C/min and held for 3 min, and then finally ramped to 300° C at 2.5° C/min and held for 15 min. The analytes were ionized using electron impact ionization, and the mass spectra were obtained using scan mode for ions with m/z ranging from 50 to 650 amu.

Quantification of individual compound mass was based on total ion peak areas normalized to the phenanthrene-d10 internal standard, assuming unit response factors. PAHs were quantified based on extraction ion peak areas. Compound identifications were based on the NIST08 Library and authentic standards for n-alkanes, 16 PAHs, 26 carbonyls and 10 FAMES.

Stein, S. Y. Mirokhin, D. Tchekhovskoi, G. Mallard (2008) The NIST Mass Spectral Search Program for the NIST/EPA/NIH Mass Spectral Library. Version 2.0 f, build Jul 23 2008.

## Dithiothreitol (DTT) Assay

An abiotic DTT assay was used to measure the B0- and B20-dependent DTT consumption. 0.5 ml of DTT (100  $\mu$ M) was added to duplicates of each tube containing 40  $\mu$ g particles and incubated at 37° C in a dry bath for 0, 15, 30, and 45 min. One set of 0.5 ml DTT without particles was used as a blank control. (Net reaction:  $\text{DTT} + 2 \text{O}_2 \rightarrow \text{DTT-disulfide} + 2 \text{O}_2^-$ ). 0.5ml of 10% trichloroacetic acid was added to the incubation mixture to stop the reaction at each designated time until all incubations were completed. A 0.5 ml aliquot of the reaction mixture was then mixed with 25  $\mu$ l of 10mM 5,5'-dithiobis-(2-nitrobenzoic acid) (DTNB), and reacted for 5 min, followed by addition of 1 ml of 0.4 M Tris-HCl, pH 8.9 with 20 mM EDTA. The concentration of the formed 5-mercapto-2-nitrobenzoic acid was measured by spectrophotometry at absorption 412 nm.

## Cell Culture and Biological Assays

**Human THP-1 monocytes** (ATCC) were grown in RPMI 1640 medium (Invitrogen) containing 10% Fetal Bovine Serum; 100 U/ml Penicillin-Streptomycin; 10mM HEPES and 1mM Sodium pyruvate at 37.0° C in 5% CO<sub>2</sub>. Cells require differentiation into a macrophage-like cell line using 100 nM phorbol-12-myristate-13-acetate (PMA) overnight and then refreshing the cells with medium without PMA prior to exposure to PM.

**Human BEAS-2B bronchial epithelial cell line** (ATCC) were seeded into flasks or plates pre-coated with a mixture of 0.01 mg/ml fibronectin, 0.03 mg/ml bovine collagen type I and 0.01 mg/ml bovine serum albumin in medium. The cells were grown in DMEM/ F12 medium (Invitrogen) containing 10% Fetal Bovine Serum; 100 U/ml of Penicillin-Streptomycin, 1 $\mu$ g/ml Insulin-Transferrin-Na selenite (Sigma), 1 $\mu$ g/ml Hydrocortisone (Sigma), and 10 mM HEPES at 37.0°C in 5% CO<sub>2</sub>.

**C57BL/6 mice** were anesthetized with inhaled isoflurane (to effect) and suspended by their incisors on a 60° incline board. The tongue was gently extended and 50  $\mu$ l of the stock solution particles delivered into the distal part of the oropharynx and aspirated into the lower respiratory tract. Mice were allowed to aspirate the material for approximately 15 seconds, after which they were returned to the cage and monitored until *fully* recovered. The dose of particles delivered was determined as the mean gravimetric mass of triplicate 50  $\mu$ l aliquots of the stock suspension on the day of use.

**Cytokines:** The culture medium in which the cells were grown and treated, as described above, was collected and centrifuged twice at 14000 rpm and the supernatants stored at -80° C until analysis. Bronchoalveolar lavage fluid (BALF) obtained from the mice at necropsy were frozen at -80° C until analysis. Lung tissue lysates were prepared by T-PER Tissue Protein Extraction Reagent complemented with Halt Protease and Phosphatase Inhibitor (Thermo Scientific). Cytokines and chemokines in the above culture medium, BALF and lung tissue lysates were analyzed using both the Bio-Plex Pro™ Assay (Bio-Rad) and Milliplex Map® Assay (Millipore). Bio-Plex-27 or Milliplex 26 human cytokine kits were used in screening of human cytokine responses. Mouse samples were analyzed using the Milliplex-22 murine cytokine kit.

All samples were prepared according to the manufacturer's instructions and ran on the Bio-Plex suspension array system (Bio-Rad). Standard curves were calculated and samples were analyzed using the Bio-Plex Manager Software Version 6 (Bio-Rad).

**Cytokine Binding Assay:** To determine whether variation in cytokine levels might be attributable to adsorption of the particles themselves, B0 and B20 particles used in the *In Vitro* and *In Vivo* experiments were added to cell-free medium at final concentrations of 0, 5, 10, 20, or 40  $\mu\text{g/ml}$ . Human G-CSF (Novus Biologicals) was added to the medium containing different concentrations of particles and mixed well. After incubation for 24 h, cytokine levels were measured using the Milliplex cytokine assay.

**Cytotoxicity:** Lactate Dehydrogenase (LDH) concentrations in the culture medium from exposed cells were measured using the Cytotox96 Assay (Promega) and used as an index of toxicity.

**OxiSelect™ Intracellular ROS:** The intracellular ROS was measured by OxiSelect™ Intracellular ROS Assay Kit (Cell Biolabs INC), which is a cell-based assay for measuring antioxidant or ROS activity. The kit included  $\text{H}_2\text{O}_2$  that was diluted to 0.1 and 1 mM and served as the positive control. Cells were seeded in a 96-well cell culture plate at  $3.2 \times 10^4$ /well overnight and then pre-incubated with DCFH-DA (cell-permeable fluorogenic probe 2', 7'-Dichlorodihydrofluorescein diacetate). The biodiesel and petrodiesel extracts were then added to the cells. After a selected period time of incubation, the cells were read on a Synergy HT microplate reader (BioTek Instruments) at 480 nm/530 nm.

**Oxidized Protein Detection:** Protein carbonyl modifications were detected and quantified using the OxyBLOT™ assay (Millipore) according the manufacturer's protocol. Briefly, protein lysates from mouse lung tissues were incubated with 2,4-Dinitrophenylhydrazine (DNPH). The DNP-derivatized protein samples were separated by SDS-PAGE followed by Western blotting. The same membranes were stripped and then reimmunoblotted with  $\beta$ -actin or stained with India ink as a loading control.

**Western-blot:** The antibodies for total or phospho-ERK1/2, caspase-1, total or phospho-EGFR (Tyr1068) were purchased from Cell Signaling; the antibody for TLR4 and Nrf2 was from Santa Cruz; the antibodies for GCLC were from Abnova and  $\beta$ -actin was from Abcam Inc. 20  $\mu\text{g}$  of each total protein was electrophoresed on 10% or 7.5% Mini-PROTEAN® TGX™ precast gels (Bio-Rad) and then electroblotted onto nitrocellulose or PVDF membranes. After blocking of membranes with 1% BSA blocking/dilution buffer, the membranes were incubated with the appropriate primary antibody at the recommended concentration overnight with shaking at 4° C and then rinsed. After incubation with corresponding secondary antibodies, the protein bands were visualized using SuperSignal™ West Pico Trial Kit (PIERCE) and exposed to radiographic films. The images and densities were captured with a GS-700 Imaging Densitometer (Bio-Rad, Richmond, CA) and analyzed with Quantity One Software Version 4.2 (Bio-Rad, Richmond, CA). The membranes were stripped and then reimmunoblotted with another antibody or  $\beta$ -actin antibody as a loading control.

**OxiSelect™ Total Glutathione (GSSG/GSH) Assay:** The total glutathione content was measured by OxiSelect™ Total Glutathione (GSSG/GSH) Assay kit (Cell Biolabs INC). The serum samples from treated and untreated mice were added to equal volumes of ice-cold 5% metaphosphoric acid, mix thoroughly and stored on ice for 10 min. The suspension was centrifuged at 12,000 rpm for 10 min at 4° C. 40 µl of supernatant then was collected and added to 96-well plate with 160 µl mixture of glutathione reductase, NADPH and chromogen. Glutathione reductase reduces oxidized glutathione (GSSG) to reduced glutathione (GSH) in the presence of NADPH. Subsequently, the chromogen reacts with the thiol group of GSH to produce a colored compound that absorbs at 405 nm. The absorbance was immediately recorded at 405 nm at 1 min intervals for 10 min on a BioTek Synergy H4 (BioTek Instruments) under perform kinetics. The GSSG/GSH was finally assessed by GSSG standard curve.

**Murine plasminogen activator inhibitor type 1 (PAI-1) ELISA:** Murine PAI-1 Total Antigen Assay kit (Molecular Innovations, Inc) was used for the quantitative determination of total PAI-1 in mouse plasma or BALF. Lungs were lavaged with PBS and then centrifuged at 3000 rpm for 3 min. Duplicates of supernatants without the cell pellets were measured according manufacturers' procedures. PAI-1 present in BALF reacted with the captured antibody-coated microtiter plate followed by the anti-PAI-1 primary and secondary antibodies, TMB was then used for color development. The plate was finally read on a Synergy HT microplate reader at 450nm. The concentration of PAI-1 protein in the BALF was determined against PAI-1 standard curve.

### **Armfield CM-12 Light-duty Diesel Engine Specifications, Test Cycle and PAH Concentrations**

The CM-12 engine is an industrial engine with a non-road emission certification EC 97/68 Stage IIIA rating. (<http://ec.europa.eu/enterprise/sectors/mechanical/documents/legislation/emissions-non-road/>, stated to be “aligned with the U.S. standards.)

For each test, the fuel tank and fuel lines were purged with the test blend the day prior to testing to ensure that no residual fuel was in the lines. Different fuel tanks are used for petrodiesel and biodiesel fuel types. Our commercial B100 biodiesel fuel met the U.S. certification by the American Society for Testing and Materials (ASTM) D6751.

A maximum of two test cycles were run per day, but particles from the 9-modes collected after the CM-12 engine coolant reached a stable temperature of 92°C (end of Warm-Up) were used for subsequent chemical and biological tests.

Stainless steel filter holders and Teflon impingers were cleaned with triplicate hexane/acetone rinses between tests.

Labview logged all engine operating parameters. QA/QC procedures included collection of instrument blanks (SPMP inlet fitted with HEPA filter) and tunnel blanks (10 minutes, engine not running; collect pre-and post- all engine tests). Blank runs involved all steps of a routine run without starting the CM-12 engine.

**Table S1.** Armfield CM-12 Engine Dynamometer Specifications

| Engine                          |                        |
|---------------------------------|------------------------|
| Manufacturer                    | Volkswagen             |
| Identification code             | ARD                    |
| Charge air                      | Naturally aspirated    |
| Capacity                        | 1896 cm <sup>3</sup>   |
| Cylinders                       | 4                      |
| Bore                            | 79.5 mm                |
| Stroke                          | 95.5 mm                |
| Compression ratio               | 19.5:1                 |
| Nominal output                  | 44 kW @ 3600 RPM       |
| Max torque                      | 130 Nm @ 2000–2400 RPM |
| Fuel                            | Diesel DIN EN590       |
| Control system                  | Bosch EDC              |
| Exhaust gas recirculation (EGR) | None                   |
| Retarder                        |                        |
| Manufacturer                    | Klam                   |
| Model number                    | K40                    |
| Max power                       | 60 kW                  |
| Max torque                      | 145 Nm                 |

**Table S2.** Armfield CM-12 Engine Operating Conditions

|                | Torque | RPM setpoint | Throttle position | % Load |
|----------------|--------|--------------|-------------------|--------|
| Warm up idle   | 0      | idle         | 0                 | 0      |
| Mode 1         | 23     | 3300         | 40                | 19     |
| Mode 2         | 2      | 3300         | 30                | 2      |
| Mode 3         | 5      | 3000         | 30                | 4      |
| Mode 4         | 10     | 2700         | 30                | 8      |
| Mode 5         | 16     | 2400         | 30                | 13     |
| Mode 6         | 25     | 2000         | 30                | 19     |
| Mode 7         | 37     | 2000         | 35                | 29     |
| Mode 8         | 51     | 2000         | 40                | 40     |
| Mode 9         | 11     | 2700         | 30                | 9      |
| Cool down idle | 0      | idle         | 0                 | 0      |

Note: Samples were collected after the warm-up (engine coolant stabilized at 92°C). Each mode's duration was 7.5 min to enable triplicate SMPS scan collection.

**Table S3.** Polycyclic Aromatic Hydrocarbon (PAH) Mass Concentrations (ng/m<sup>3</sup>)

| PAH                    | blank      | B0          | B20         | error (%) <sup>a</sup> |
|------------------------|------------|-------------|-------------|------------------------|
| naphthalene            | ND         | 319         | 142         | 2                      |
| acenaphthylene         | ND         | 237         | 93          | 0.0                    |
| acenaphthene           | 63         | 189         | 77          | 1.1                    |
| fluorene               | 51         | 171         | 68          | 0                      |
| phenanthrene           | 38         | 152         | 49          | 1.6                    |
| anthracene             | ND         | 218         | 100         | 6.5                    |
| fluoranthene           | 40         | 135         | 76          | 6.3                    |
| pyrene                 | ND         | 191         | 137         | 5.4                    |
| benzo[a]anthracene     | ND2        | 177         | 84          | 1.6                    |
| chrysene               | 42         | 139         | 64          | 0.6                    |
| benzo[b]fluoranthene   | 46         | 142         | 77          | 0                      |
| benzo[k]fluoranthene   | 48         | 168         | 61          | 4.0                    |
| benzo[a]pyrene         | ND         | 175         | 103         | 10.4                   |
| indeno[1,2,3-cd]pyrene | 56         | 184         | 74          | 1.0                    |
| benzo[ghi]perylene     | 43         | 160         | 70          | 1.8                    |
| dibenz[a,h]anthracene  | 65         | 207         | ND          | 0.3                    |
| <i>total PAH</i>       | <i>492</i> | <i>2964</i> | <i>1277</i> |                        |

<sup>a</sup>Error based on extractions of duplicate punches of biodiesel filter as percent relative standard deviation.

### Other Cytokine Concentrations in Cells and BALF

**Table S4** THP-1 Cells - Cytokine/Chemokine Concentrations (pg/ml)

| Treatment | Eotaxin   | IL-6    | IL-7      | IFNA2    | IP-10        | MCP-1        |
|-----------|-----------|---------|-----------|----------|--------------|--------------|
| Con       | 63.6 ± 23 | 6.1 ± 1 | 59.1 ± 1  | 14.9 ± 1 | 12685 ± 563  | 11508 ± 2086 |
| Vehic     | 68.0 ± 32 | 5.2 ± 0 | 55.2 ± 8  | 20.3 ± 9 | 10312 ± 526  | 11885 ± 2707 |
| Amorp     | 65.2 ± 25 | 5.0 ± 1 | 52.2 ± 3  | 19.7 ± 6 | 7336 ± 3050  | 11147 ± 542  |
| Cristob   | 67.0 ± 29 | 6.9 ± 0 | 56.1 ± 12 | 14.5 ± 0 | 17803 ± 5213 | 11518 ± 3262 |
| B20-10    | 66.0 ± 30 | 2.5 ± 1 | 61.0 ± 6  | 14.8 ± 5 | 756 ± 168    | 1863 ± 550   |
| B20-20    | 58.6 ± 19 | 1.8 ± 0 | 45.6 ± 4  | 11.0 ± 3 | 158 ± 45     | 201 ± 58     |
| B0-10     | 58.4 ± 22 | 3.1 ± 1 | 46.5 ± 10 | 15.5 ± 7 | 392 ± 64     | 458 ± 217    |
| B0-20     | 65.6 ± 36 | 1.7 ± 1 | 56.3 ± 21 | 10.2 ± 5 | 187 ± 24     | 185 ± 42     |

Levels of other cytokines/chemokines detected by the MilliPlex-26 kit in medium of THP-1 cells exposed to control medium (Con), vehicle (Vehic, ethanol), amorphous silica (Amorp), cristobalite (Cristob), dose of 10 µg/ml B20 particles (B20-10), dose of 20 µg/ml B20 (B20-20), dose of 10 and 20 µg/ml B0 (B0-10 and B0-20). Values are mean ± SE.

**Table S5** BEAS-2B cells - Cytokines/Chemokines Concentrations (pg/ml)

| Treatment | Eotaxin    | G-CSF     | IL-6       | IP-10     | MIP-1a    |
|-----------|------------|-----------|------------|-----------|-----------|
| Con       | 11.0 ± 6.2 | 6.2 ± 3.1 | 10.5 ± 1.8 | 5.7 ± 1.3 | 5.8 ± 2.3 |
| Vehic     | 8.9 ± 3.0  | 3.0 ± 0.7 | 8.7 ± 1.0  | 4.5 ± 0.3 | 6.0 ± 2.1 |
| Amorp     | 11.6 ± 5.9 | 5.9 ± 0.7 | 12.7 ± 2.0 | 6.0 ± 3.7 | 7.6 ± 2.0 |
| Cristob   | 9.4 ± 4.4  | 4.4 ± 1.2 | 14.0 ± 2.6 | 4.5 ± 0.3 | 6.5 ± 2.0 |
| B20-10    | 9.6 ± 6.5  | 6.5 ± 1.4 | 10.8 ± 1.3 | 3.6 ± 1.7 | 6.4 ± 2.8 |
| B20-20    | 7.3 ± 3.5  | 3.5 ± 0.9 | 11.1 ± 2.0 | 3.5 ± 1.9 | 5.6 ± 2.5 |
| B0-10     | 7.4 ± 3.3  | 3.3 ± 0.2 | 10.7 ± 2.4 | 3.1 ± 1.4 | 5.7 ± 2.4 |
| B0-20     | 10.1 ± 4.5 | 4.5 ± 0.8 | 10.1 ± 1.6 | 3.5 ± 1.9 | 6.2 ± 2.0 |

Levels of other cytokines/chemokines detected by the MilliPlex-26 kit in medium of BEAS-2B cells exposed to control medium (Con), vehicle (Vehic, ethanol), amorphous silica (Amorp), cristobalite (Cristob), dose of 10  $\mu$ g/ml B20 particles (B20-10), dose of 20  $\mu$ g/ml B20 (B20-20), dose of 10 and 20  $\mu$ g/ml B0 ( B0-10 and B0-20). Values are mean  $\pm$  SE.

**Table S6** Cytokines/chemokines Concentrations in BALF (pg/ml) and Lung Tissue Homogenates (pg/mg protein)

| Cytokine        | Group: | Con          | B20           | B0            |
|-----------------|--------|--------------|---------------|---------------|
| A. Lung BALF    |        |              |               |               |
| IL-5            |        | 6.39 ± 2.3   | 53.77 ± 10.2  | 24.18 ± 9.9   |
| KC              |        | 4.46 ± 1.2   | 5.48 ± 2.3    | 1.68 ± 1.2    |
| B. Lung Tissues |        |              |               |               |
| KC              |        | 343.1 ± 52.0 | 415.7 ± 68.9  | 300.5 ± 58.3  |
| MCP-1           |        | 425.4 ± 98.7 | 652.6 ± 111.9 | 537.9 ± 120.0 |
| IFNg            |        | 39.8 ± 16.3  | 48.9 ± 7.6    | 31.2 ± 9.7    |
| IL-1A           |        | 103.2 ± 32.0 | 95.3 ± 14.1   | 72.4 ± 16.7   |
| IL-1B           |        | 355.9 ± 76.3 | 368.1 ± 74.6  | 271.5 ± 56.3  |
| IL-10           |        | 61.9 ± 15.5  | 58.2 ± 12.7   | 37.3 ± 8.4    |
| IL-13           |        | 83.9 ± 30.5  | 128.3 ± 26.7  | 55.6 ± 11.3   |
| IL-15           |        | 101.9 ± 25.9 | 101.2 ± 23.3  | 55.4 ± 15.6   |
| MIP-1A          |        | 204.8 ± 38.1 | 222.8 ± 31.4  | 151.4 ± 28.7  |
| TNF-A           |        | 22.3 ± 3.8   | 22.5 ± 4.7    | 16.3 ± 2.8    |

Levels of other cytokines/chemokines detected in BALF (A) and lung tissue (B) by the MilliPlex-22 kit. Values are mean  $\pm$  SE.



## SMPS Particle Distributions – Number, Surface Area and By Engine Mode

**Figure S1.** Number and surface area weighted particle distributions for two fuel types, petrodiesel (B0) and 20% biodiesel (B20).

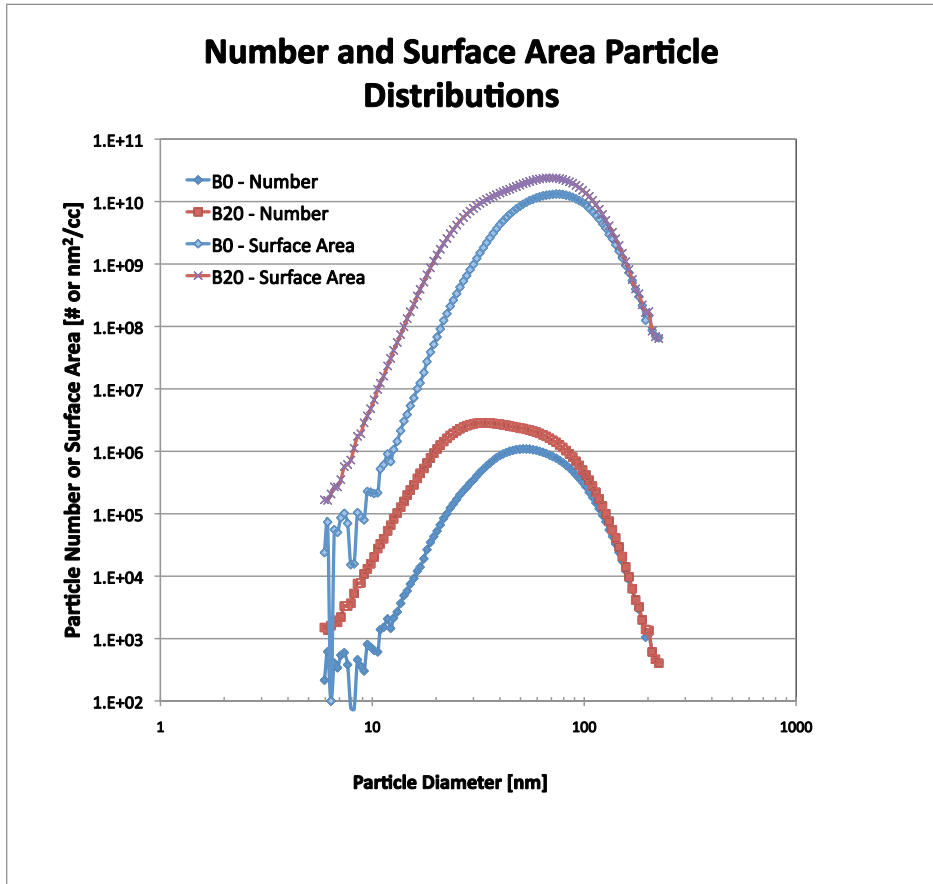

**Figure S2.** Individual operating mode mean SMPS particle number distributions for petrodiesel (B0) and 20% soy biodiesel fuel (B20). The last mode is cool-down. Warm-up data not shown.

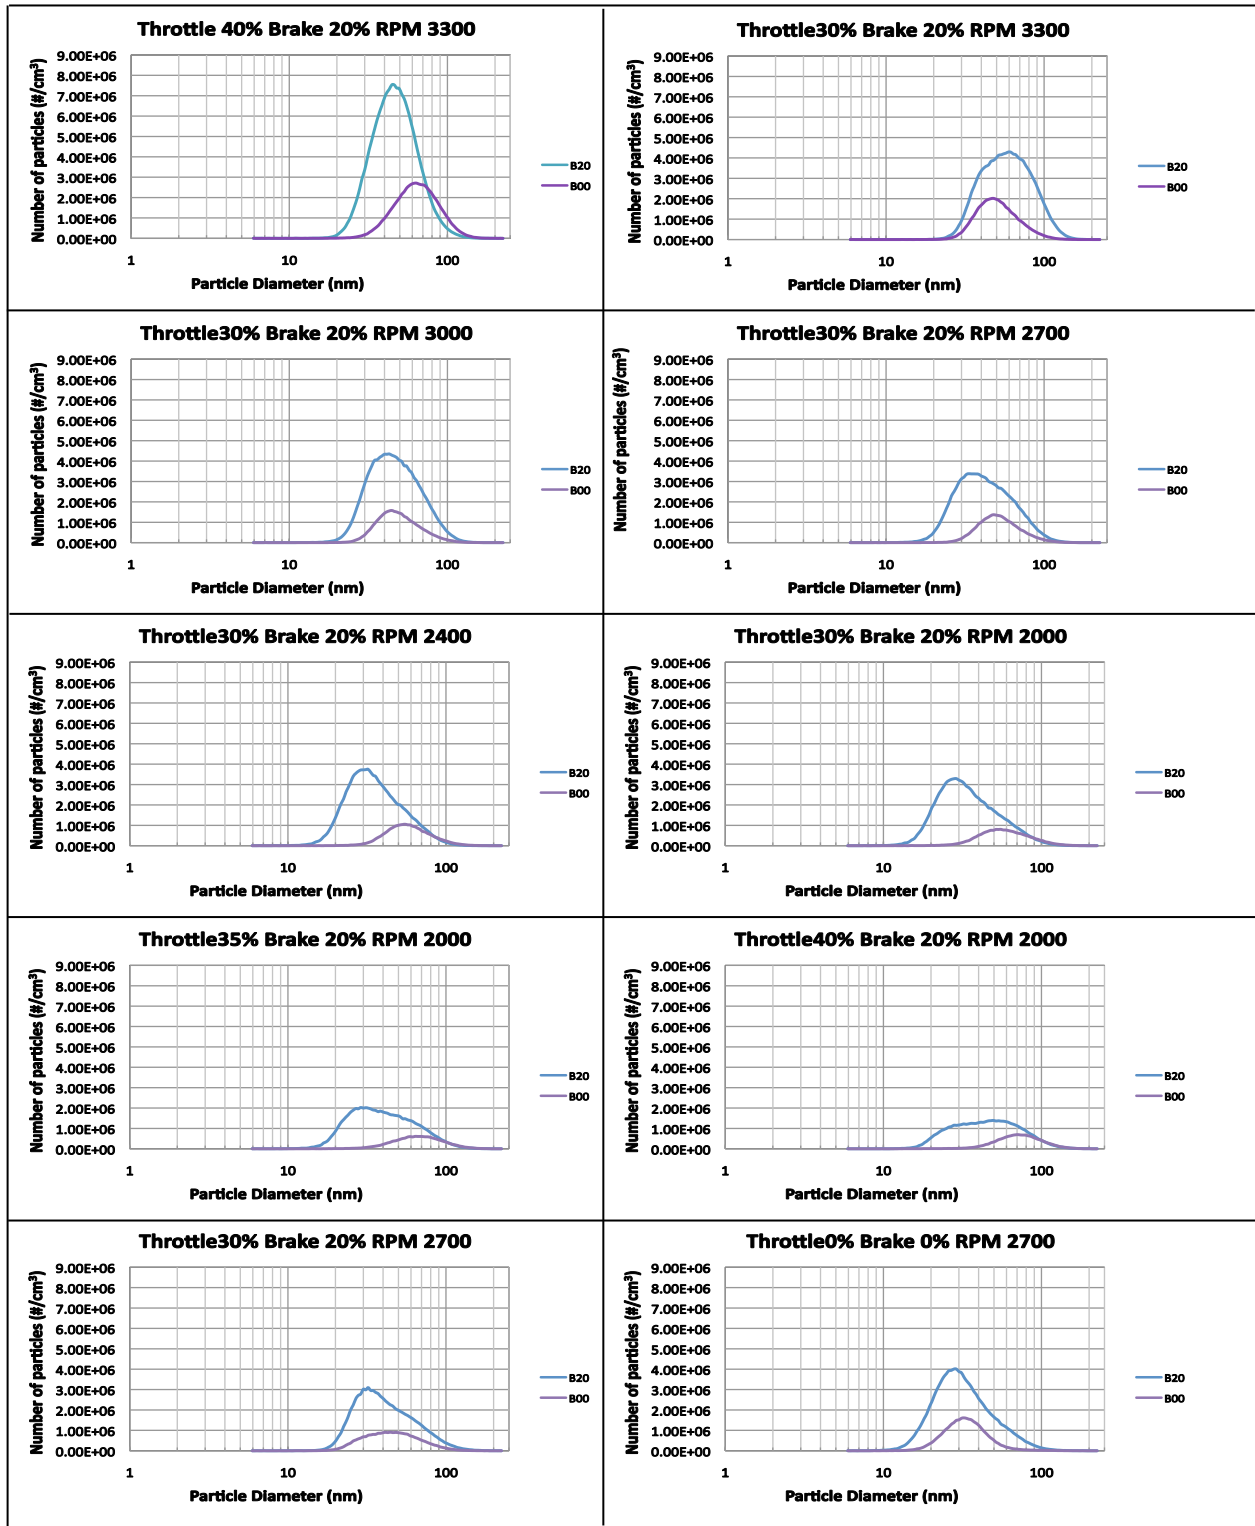

## Relative Particle Composition by Functional Groups

**Figure S3.** Relative functional group organic composition by fuel type based on TD-GCMS analysis of filter punches. Data are means of single punches for filters #18 and #40 and two punch extractions for filters 27, 33.

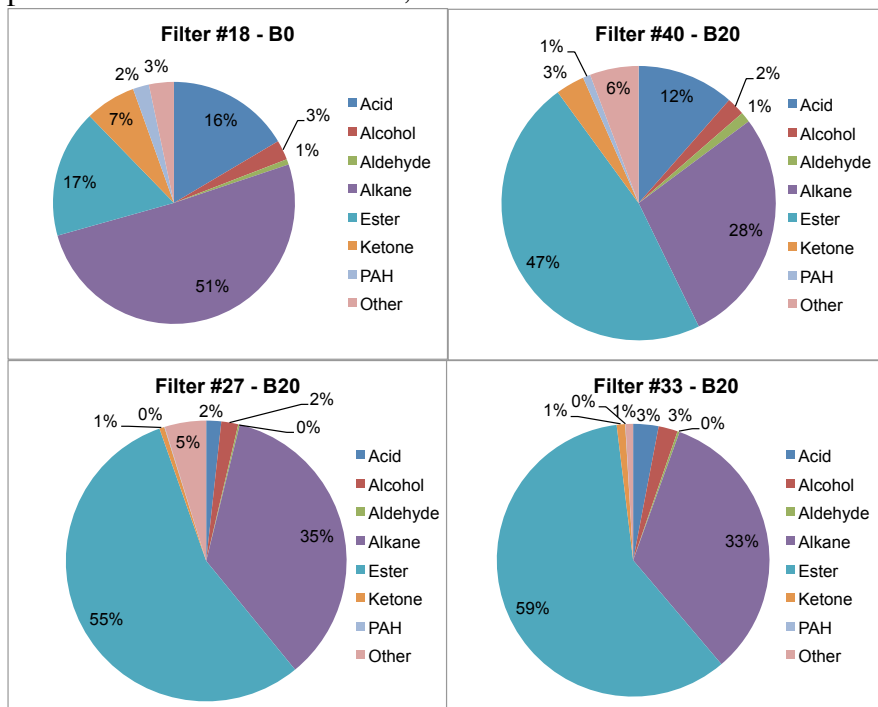

**Figure S4.** Filter punch polar and nonpolar composition based on GCMS analysis and functional group assignments from NIST library search. Data are means of single punches for filters #18 and #40 and two punch extractions for filters 27, 33.

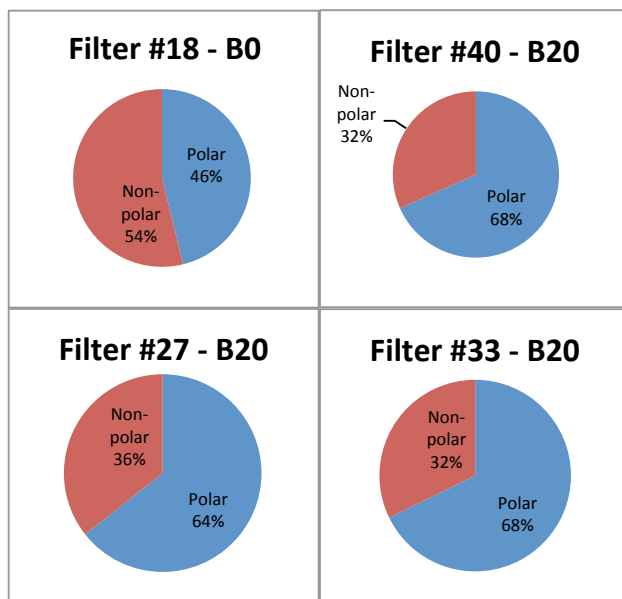

## Cytotoxicity Results

**Figure S5** Particles derived from both types of fuel had minimal cytotoxicity in the THP-1 cells (A) and BEAS-2B cells (B). B20-10, dose of 10  $\mu\text{g/ml}$  B20 particles ; B20-20, dose of 20  $\mu\text{g/ml}$  B20; B0-10 and B0-20, dose of 10 and 20  $\mu\text{g/ml}$  B0, respectively. Only cristobalite resulted in significantly more cytotoxicity in BEAS-2B cells (\* $P < 0.05$ ).

### A. LDH Assay in THP-1 Cells

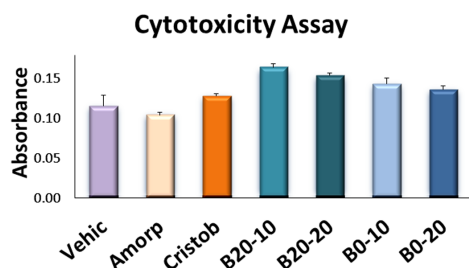

### B. LDH Assay in BEAS-2B-Cells

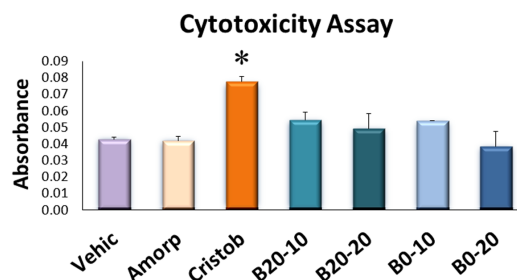

## Cytokine Adsorption to Particles in Cell-free Medium

**Figure S6** Cytokine binding assay in cell-free medium containing B0 and B20 exhaust particles. The same concentration of G-CSF were added to a series of doses of particles. After 24 h incubation, G-CSF concentrations in the medium were measured by the Milliplex Cytokine kit. The actual measured G-CSF concentrations are shown in the graph for the different particle concentrations (mean  $\pm$  SE). No significant differences were found between measured G-CSF concentrations at all doses of particles, suggesting that the dose of particles had no effect on the measured values of G-CSF.

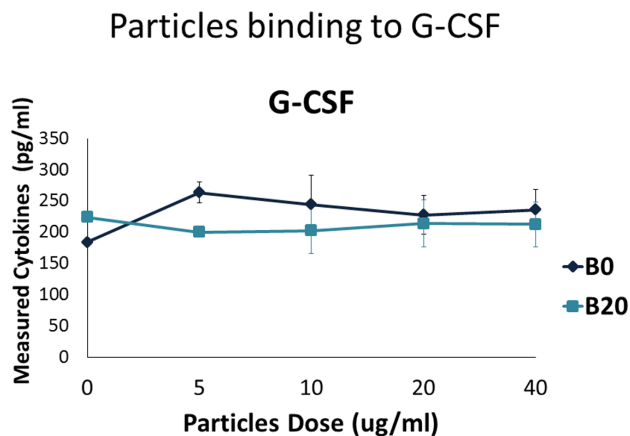

**Figure S7.** Both B20 and B0 particles induced an increase of PAI-1 in BALF (A) of mice treated for 3 days (\*P<0.05 compared to control), but not in lung tissues (B). Values are mean±SE.

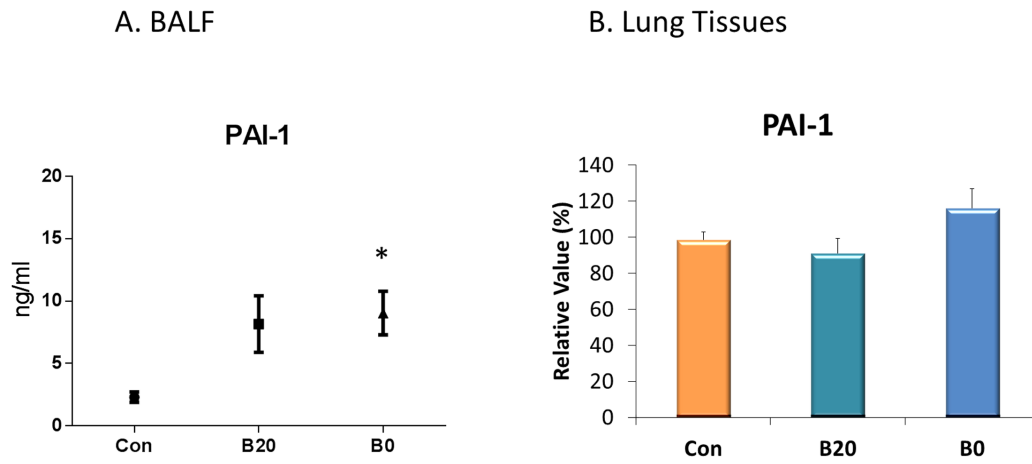

Supplement: NIHMS531356-supplement-1_si_001.pdf [file NIHMS531356-supplement-1_si_001.pdf]
